# Supplementary material for: Ultralight flexible 3D nickel micromesh decorated with NiCoP for high stability alkaline zinc batteries
Source: Royal Society of Chemistry journal article supplement (doi:10.1039/d4nr04021j), 2025-01-01
Supplement: d4nr04021j1.pdf [file d4nr04021j1.pdf]

## Supplementary Information

### Ultralight Flexible 3D Nickel Micromesh Decorated with NiCoP for High Stability Alkaline Zinc Batteries

*Zana Karim Abdul<sup>1,3</sup>, Zeqi Nie<sup>1</sup>, Yapeng Zhang<sup>1</sup>, XiuXue Liu<sup>1</sup>, XiaohuWang<sup>1</sup>, Niwamanya Gilbert<sup>1</sup>, Donghai Wei<sup>1,2\*</sup>, Wen Zhang<sup>4\*</sup>, Guanhua Zhang<sup>1,3</sup>*

<sup>1</sup> State Key Laboratory of Advanced Design and Manufacturing Technology for Vehicle, College of Mechanical and Vehicle Engineering, Hunan University, Changsha 410082, China

<sup>2</sup> Hunan University of Technology, Zhuzhou 412008, China

<sup>3</sup> Greater Bay Area Institute for Innovation, Hunan University, Guangzhou 511300, China

<sup>4</sup> Department of Chemical and Materials Engineering, the University of Auckland, Auckland CBD, Auckland 1142, New Zealand

E-mail: weidonghai000@126.com; zhang.wen@auckland.ac.nz

## Table of Contents

|                                                                                                                                                                                    |            |
|------------------------------------------------------------------------------------------------------------------------------------------------------------------------------------|------------|
| <b>Chemical reagents</b> .....                                                                                                                                                     | <b>P4</b>  |
| <b>Experimental methods</b> .....                                                                                                                                                  | <b>P5</b>  |
| <b>Material characterization and electrochemical measurements</b> .....                                                                                                            | <b>P6</b>  |
| <b>Figure S1.</b> Thickness measurements of a) 3D NM and b) zinc foil.....                                                                                                         | <b>P7</b>  |
| <b>Figure S2.</b> Digital photograph of Ni mesh showing a) Lightness and flexibility of the Ni mesh,<br>and b) transparency of the Ni mesh.....                                    | <b>P8</b>  |
| <b>Figure S3.</b> Elemental mapping images of the 3D NM@NiCoP.....                                                                                                                 | <b>P9</b>  |
| <b>Figure S4.</b> The sheet resistance of a) NM mesh, and b) 3D NM electrode.....                                                                                                  | <b>P10</b> |
| <b>Figure S5.</b> a) XRD patterns of Ni, 3D NM and 3D NM@NiCoP, b) Raman spectrum of 3D<br>NM@NiCoP. ....                                                                          | <b>P11</b> |
| <b>Figure S6.</b> a) Rate performance, (b) capacity comparison and.....                                                                                                            | <b>P12</b> |
| <b>Figure S7.</b> Schematic illustration of the fabrication process for Zn@TiO <sub>2</sub> . a) Zinc foil, b) Zinc<br>foil after coating with a 20 nm TiO <sub>2</sub> layer..... | <b>P13</b> |
| <b>Figure S8.</b> Digital photograph of the zinc plate before (left) and after (right) coating with 20 nm<br>TiO <sub>2</sub> via ALD.....                                         | <b>P14</b> |
| <b>Figure S9.</b> Digital photographs of the surface layer of Zn@TiO <sub>2</sub> anodes after immersion in KOH<br>with (a-c) cleaned and (b-d) Non-cleaned Zn foil.....           | <b>P15</b> |
| <b>Figure S10.</b> Electrochemical performance of Zn@TiO <sub>2</sub> //3D NM@NiCoP in 2 M KOH.....                                                                                | <b>P16</b> |
| <b>Figure S11.</b> Two-electrode corrosion test of Zn@TiO <sub>2</sub> //3D NM@NiCoP.....                                                                                          | <b>P17</b> |
| <b>Figure S12.</b> Schematic illustration of the fabrication process for 3D Zn@Al <sub>2</sub> O <sub>3</sub> @TiO <sub>2</sub> .....                                              | <b>P18</b> |
| <b>Figure S13.</b> Comparative I-V tests for Zn foil, Zn@ TiO <sub>2</sub> and Zn@Al <sub>2</sub> O <sub>3</sub> @TiO <sub>2</sub> .....                                           | <b>P19</b> |
| <b>Figure S14.</b> Contact angles of a) bare Zn b) Zn@TiO <sub>2</sub> and c) Zn@Al <sub>2</sub> O <sub>3</sub> @TiO <sub>2</sub> with water<br>droplets.....                      | <b>P20</b> |

**Figure S15.** Surface XRD patterns of Zn foil, Zn@TiO<sub>2</sub> and Zn@Al<sub>2</sub>O<sub>3</sub>@TiO<sub>2</sub> electrodes.....**P21**

**Figure S16.** a) Comparison of the areal capacity of the Zn@Al<sub>2</sub>O<sub>3</sub>@TiO<sub>2</sub>//3D NM@NiCoP with results from other studies at various current densities, b) comparison of cycling stability between devices with Zn@TiO<sub>2</sub> and Zn@AL<sub>2</sub>O<sub>3</sub>@TiO<sub>2</sub> anodes at same current density of 3 mA cm<sup>-2</sup> in a two-electrode system.....**P22**

**Table S1.** Performance comparison of relevant works in a three-electrode system.....**P23**

**Table S2.** Performance comparison of energy storage devices in a 2-Electrode Cell.....**P24**

**Table S3.** Comparison of the cycling stability of Zn@Al<sub>2</sub>O<sub>3</sub>@TiO<sub>2</sub>//3D NM@NiCoP from this work with other materials used in electrochemical energy storage devices in units of cm<sup>2</sup>.....**P25**

**Supplementary references**.....**P26**

## Chemical Reagents

Nickel sulfate hexahydrate ( $\text{NiSO}_4 \cdot 6\text{H}_2\text{O}$ , AR, Aladdin), nickel chloride hexahydrate ( $\text{NiCl}_2 \cdot 6\text{H}_2\text{O}$ ,  $\geq 98.0\%$ , Aladdin), ammonium chloride ( $\text{NH}_4\text{Cl}$ , 99.5%, Aladdin),  $\text{CoSO}_4 \cdot 7\text{H}_2\text{O}$  ( $\geq 99.0\%$ , Aladdin),  $\text{NaH}_2\text{PO}_4 \cdot \text{H}_2\text{O}$  (AR, Aladdin),  $\text{C}_6\text{H}_5\text{Na}_3\text{O}_7 \cdot 2\text{H}_2\text{O}$  (AR, Aladdin), sodium hydroxide (NaOH, AR, Aladdin), potassium hydroxide (KOH,  $\geq 85\%$ , Aladdin), lithium hydroxide monohydrate ( $\text{LiOH} \cdot \text{H}_2\text{O}$ , 98%, Aladdin), boric acid ( $\text{H}_3\text{BO}_3$ ,  $\geq 99.5\%$ , Aladdin), sulfuric acid ( $\text{H}_2\text{SO}_4$ , ACS reagent, 95.0-98.0 %), all the chemicals were of analytical grade and used without further purification.

Indium tin oxide (ITO) was purchased from South China Xiang Cheng Technology Co., Ltd. The photoresist (PR, RZJ-390PG-50CP) was obtained from Suzhou Rui Hong Electronic Chemical Co., Ltd. Deionized water used in all experiments was prepared using a Hitech-K flow water purification system (Hitech Instrument Co., Ltd., Shanghai, China).

## Experimental methods

### Fabrication of 3D Ni Mesh (NM)

A layer of photoresist was first spin-coated onto the indium tin oxide (ITO) substrate at sequential spin speeds of 500 rpm for 10 s and 800 rpm for 30 s. The ITO substrates were then dried at 100°C for 3 minutes. Using a 3D honeycomb-patterned mask plate (7.5  $\mu\text{m}$ , 100  $\times$  100 mm) and exposed to a specific UV wavelength, the photoresist underwent a photochemical reaction, resulting in areas with different solubility. Unexposed photoresist was removed using 0.5% NaOH, yielding precise lithographic patterns. To create an ordered cellular array network, micro-gullies were filled by selective electrodeposition of Ni foam at 2 V and 30 mA  $\text{cm}^{-2}$  for 2400 s. The bath solution composed 7.85 mg  $\text{NiSO}_4 \cdot 6\text{H}_2\text{O}$  and 1.3 mg  $\text{NH}_4\text{Cl}$ . The Ni micromesh (NM) was then peeled off from the ITO by immersing in an etching solution containing 5% NaOH for 1 minute. The resulting 3D Ni mesh had a thickness of approximately 0.004 mm, as shown in Figure S1a.

### Preparation of 3D NM@NiCoP electrode

In the secondary electrodeposition process, a self-supporting 3D NM (1 $\times$ 1  $\text{cm}^2$ ) was immersed in a solution containing 20 mg  $\text{NiCl}_2 \cdot 6\text{H}_2\text{O}$ , 4 mg  $\text{NH}_4\text{Cl}$  and 10 mg  $\text{H}_3\text{BO}_3$  in 100 ml of deionized water (DI). The bath temperature was maintained at 60 °C, and a current density of 10 mA  $\text{cm}^{-2}$  was applied for 600 seconds. NiCoP was electrodeposited onto the 3D Ni mesh to obtain 3D NM@NiCoP. The electrochemical deposition was performed in a standard three-electrode cell (CHI660E), with the 3D Ni mesh as the working electrode, platinum as the counter electrode, and Hg/HgO as the reference electrode. Cycling voltammetry (CV) was conducted with the potential range from -0.3V to -1.2 V at a scan rate of 2 mV  $\text{s}^{-1}$  for 60 cycles. The solution comprised 0.3 mg  $\text{NiSO}_4 \cdot 6\text{H}_2\text{O}$ , 0.3514 mg  $\text{CoSO}_4 \cdot 7\text{H}_2\text{O}$ , 2.6 mg  $\text{NaH}_2\text{PO}_4 \cdot \text{H}_2\text{O}$  and 1.47 mg  $\text{C}_6\text{H}_5\text{Na}_3\text{O}_7 \cdot 2\text{H}_2\text{O}$  in 50 ml DI water.

### Preparation of Zn@Al<sub>2</sub>O<sub>3</sub>@TiO<sub>2</sub> anode

Zinc foil (Zn, 99.9%, 5 $\times$ 5cm) was ultrasonically cleaned in ethanol and DI water to remove surface impurities and then dried at 60°C in vacuum oven for 45 minutes. Using the NCE-200 R atomic layer deposition system, a 10 nm layer of Al<sub>2</sub>O<sub>3</sub> was coated onto the prepared Zn plate at 130°C, followed by the deposition of a 20 nm layer of TiO<sub>2</sub> at 120°C on the Zn@Al<sub>2</sub>O<sub>3</sub>.

### Material characterization and Electrochemical Measurements

Microstructure analysis of the samples was conducted using field-emission scanning electron microscopy (SEM) (Carl Zeiss SIGMA HD) and optical microscopy (Carl-Zeiss AXIO-10). Raman spectra were obtained using a confocal microscopy system with a 532 nm laser wavelength (WITec Alpha-300 R) at room temperature. X-ray diffraction (XRD) patterns were acquired using an Siemens D-5000 diffractometer. Electrochemical depositions were carried out using an electrochemical workstation (CHI660e) and a source meter. All electrochemical measurements, including cyclic voltammetry (CV), galvanostatic charge-discharge (GCD) and electrochemical impedance spectroscopy (EIS), were conducted in a 2 M KOH solution at room temperature using the same electrochemical workstation. In these experiments, the synthesized samples served as the working electrode, while a Pt sheet, and a mercuric oxide electrode (HgO) were used as the counter electrode and the reference electrode, respectively. The charge storage properties of the asymmetric device, constructed with the Zn@AL<sub>2</sub>O<sub>3</sub>@TiO<sub>2</sub> anode and the 3D NM@NiCoP cathode, were evaluated under a two-electrode mode using the electrochemical station.

The areal capacity was calculated according to the following equation:

$$C_a = I \times \Delta t \div (S \times 3.6) \quad (1)$$

Where  $C_a$  ( $\mu\text{Ah cm}^{-2}$ ) represents the areal capacitance,  $I$  (mA) is the charge/discharge current,  $\Delta t$  (s) is the discharge time, and  $S$  is the loading area of the active material ( $1 \times 1 \text{ cm}^2$  in this work).

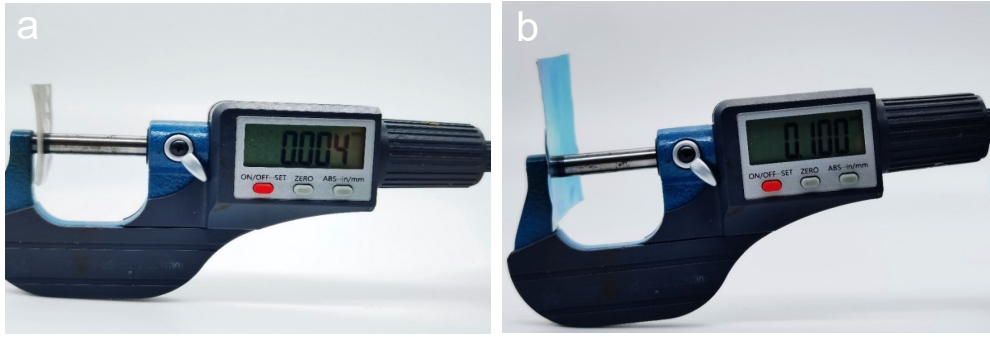

**Figure S1.** Thickness measurements of a) 3D NM: 0.004 mm and b) zinc foil: 0.1 mm.

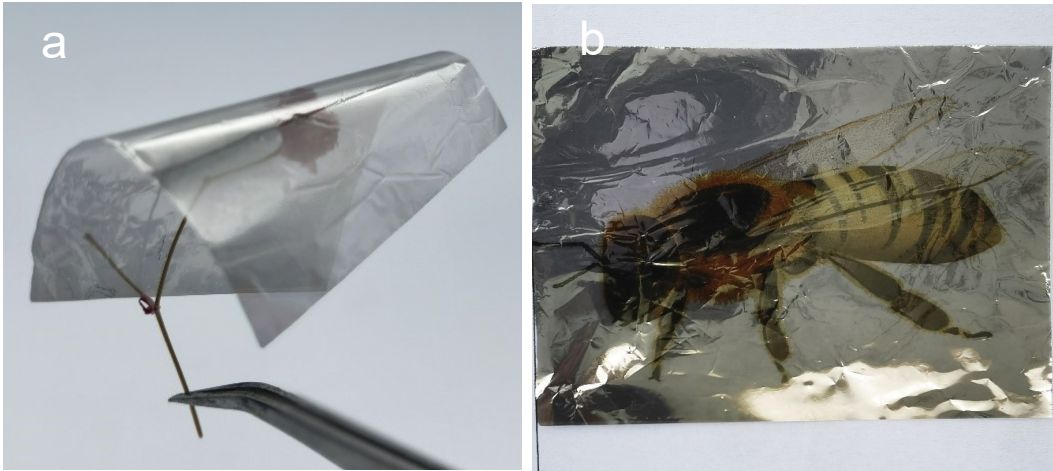

**Figure S2.** Digital photograph of Ni mesh showing a) lightness and flexibility of the Ni mesh, and b) transparency of the Ni mesh.



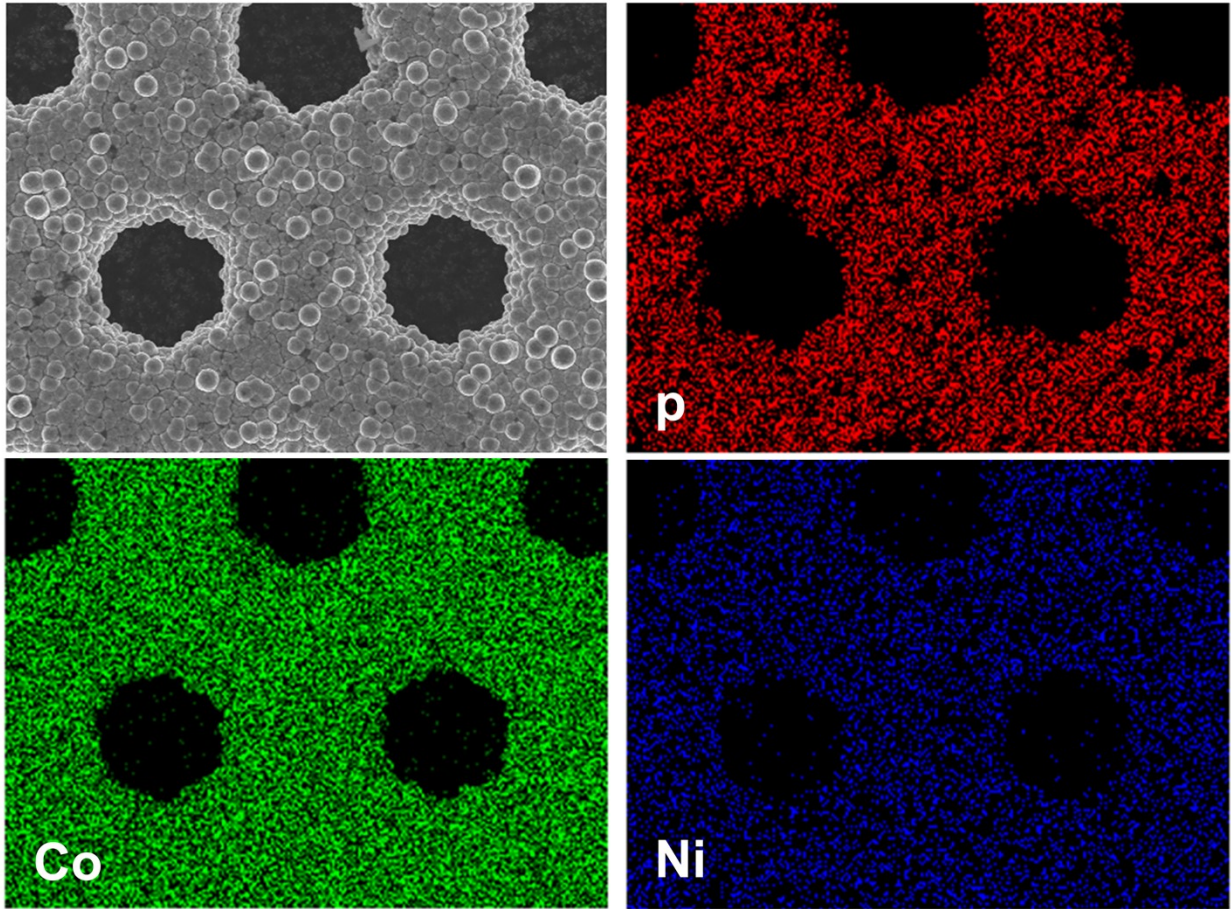

**Figure S3.** SEM image and the corresponding elemental mapping images of the 3D NM@NiCoP.

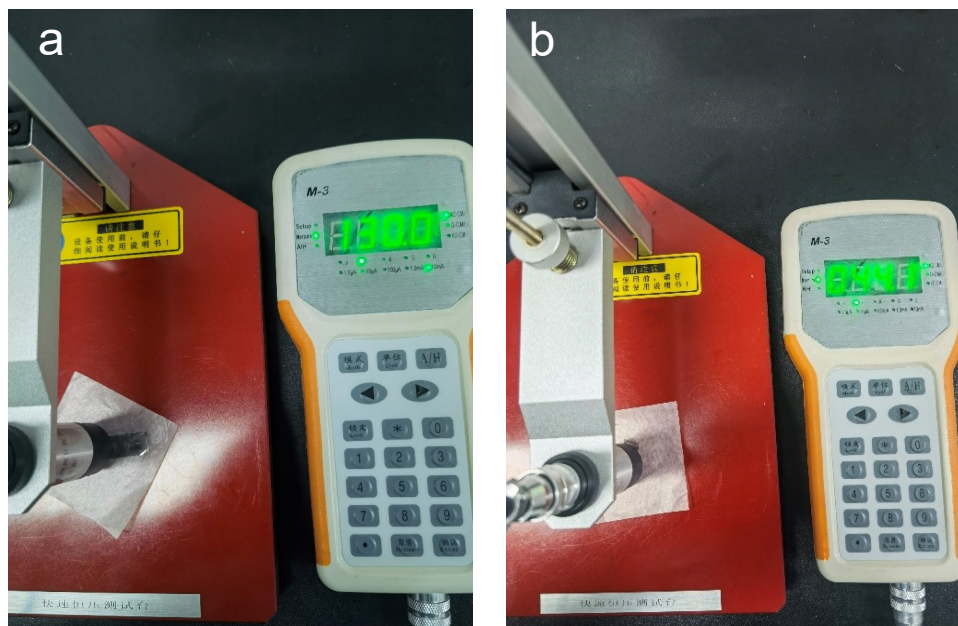

**Figure S4.** The sheet resistance of a) NM electrode and b) 3D NM electrode.

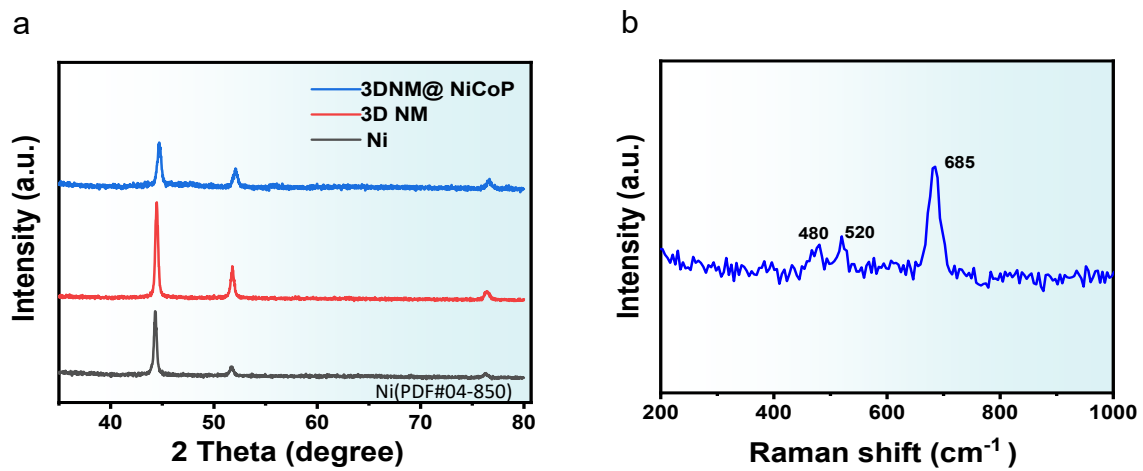

**Figure S5.** a) XRD patterns of Ni, 3D NM and 3D NM@NiCoP, b) Raman spectrum of 3D NM@NiCoP.

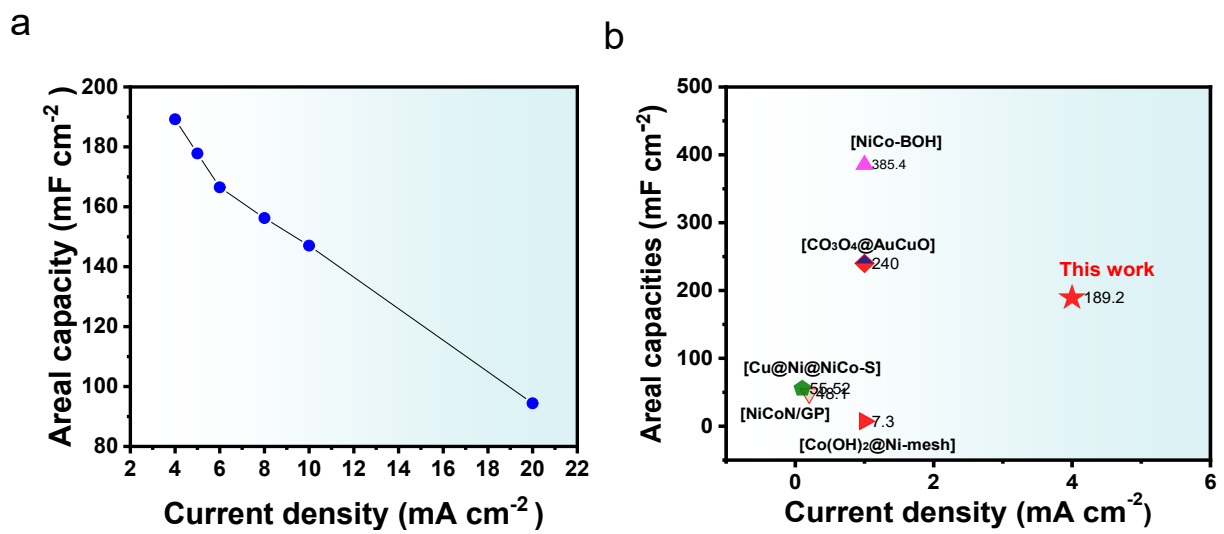

**Figure S6.** a) Rate performance of 3D NM@NiCoP, b) comparison of the rate capabilities in this work with reported NiCoP values (transformed from literature data).<sup>2, 3, 5, 6, 11</sup>

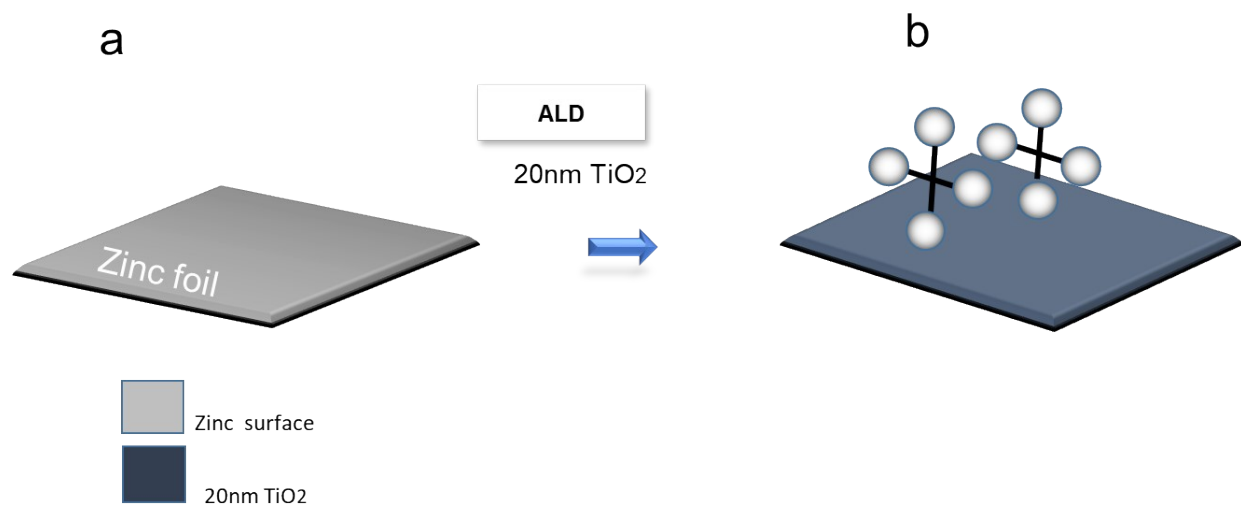

**Figure S7.** Schematic illustration of the fabrication process for Zn@TiO<sub>2</sub>. a) zinc foil, b) zinc foil after coating with a 20 nm TiO<sub>2</sub> layer.

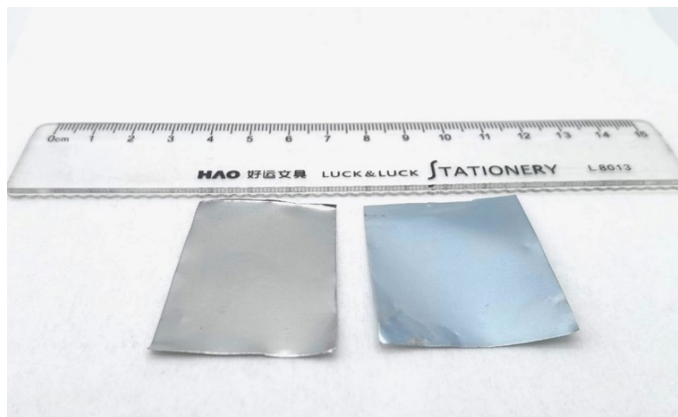

**Figure S8.** Digital photograph of the zinc plate before (left) and after (right) coating with 20 nm  $\text{TiO}_2$  via ALD.

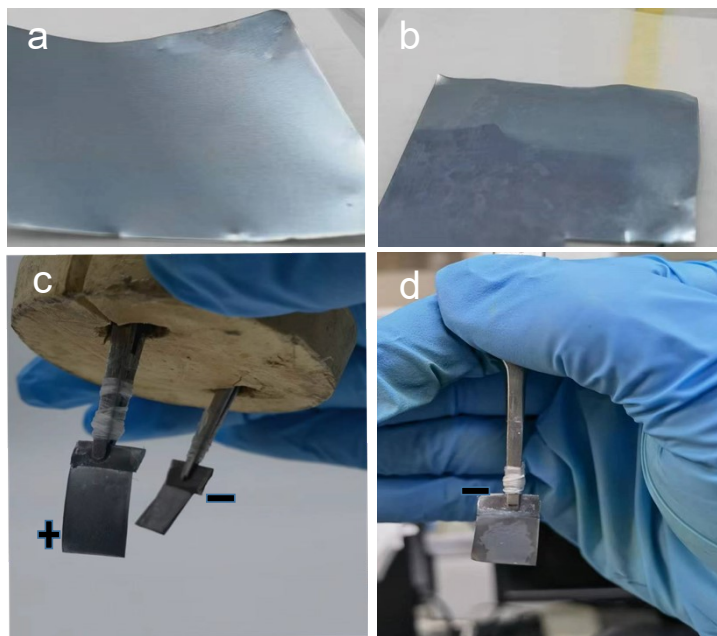

**Figure S9.** Digital photographs showing the surface of Zn@TiO<sub>2</sub> anodes after immersion in KOH: a-c) cleaned Zn foil coated with TiO<sub>2</sub>, with the surface remaining intact and stable after more than 28 hours in KOH, b-d) Non-cleaned Zinc foil coated with TiO<sub>2</sub>, where the ALD layer is compromised after more than 28 hours in KOH.

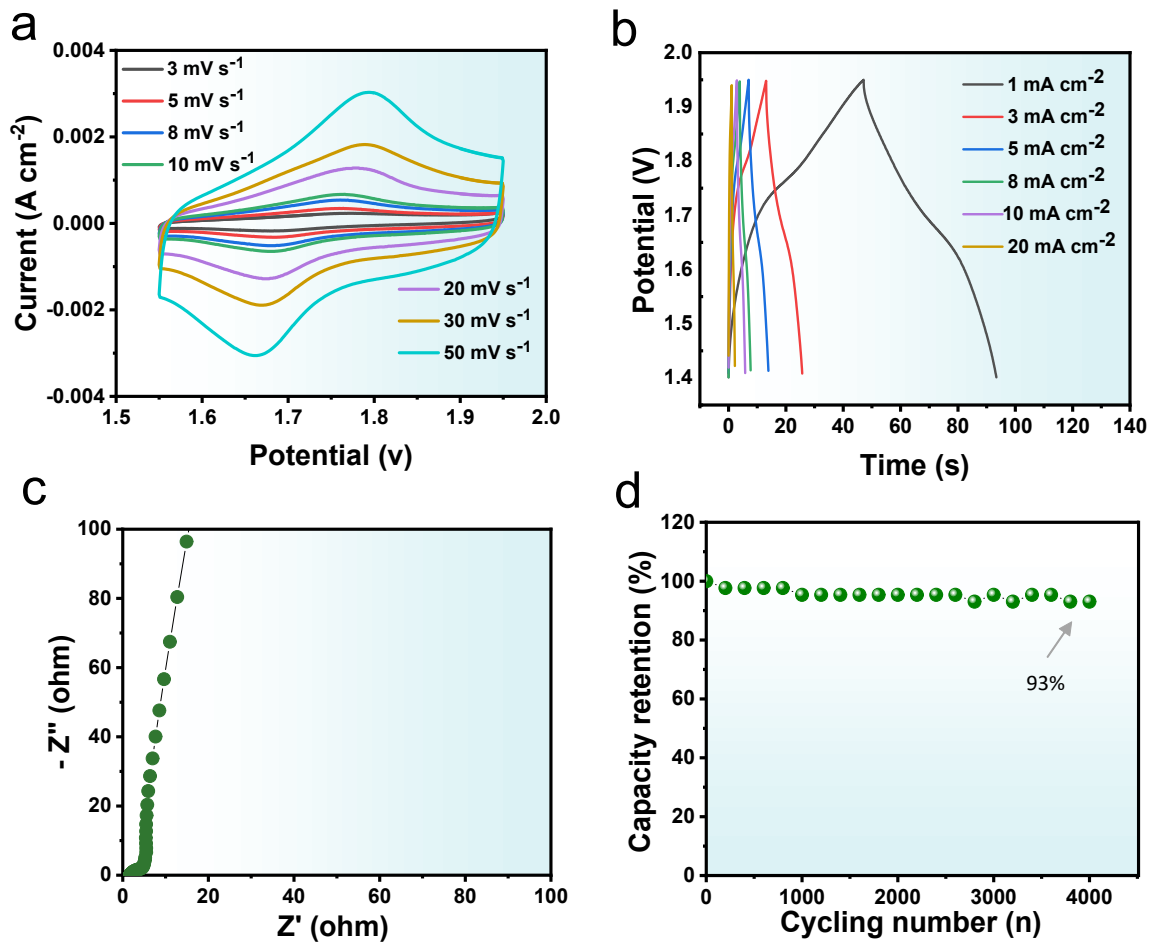

**Figure S10.** Electrochemical performance of Zn@TiO<sub>2</sub>//3D NM@NiCoP in 2 M KOH: a) Cyclic voltammetry (CV) curves, b) galvanostatic charge-discharge (GCD) curves, c) Nyquist impedance spectra (EIS), d) plot of maximum capacity at a current density of 3 mA cm<sup>-2</sup>.



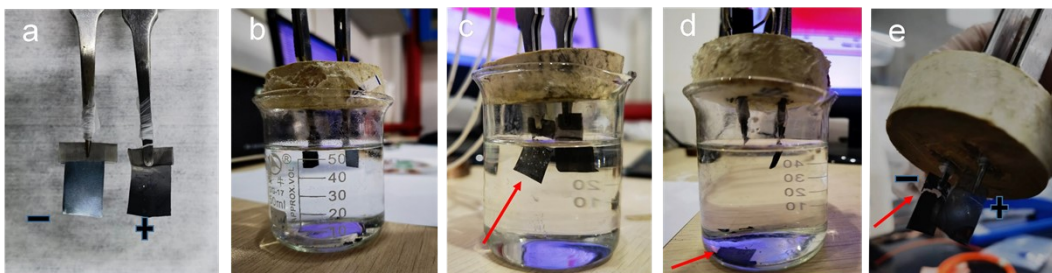

**Figure S11.** Two-electrode corrosion test for Zn@TiO<sub>2</sub>//3D NM@NiCoP: a) anode and cathode appearances, b) anode and cathode in 2M KOH, c) Zn@TiO<sub>2</sub> in 2 M KOH showing significant hydrogen evolution, d) Zn@TiO<sub>2</sub> varnished in the solution and e) corrosion of Zn@TiO<sub>2</sub>.

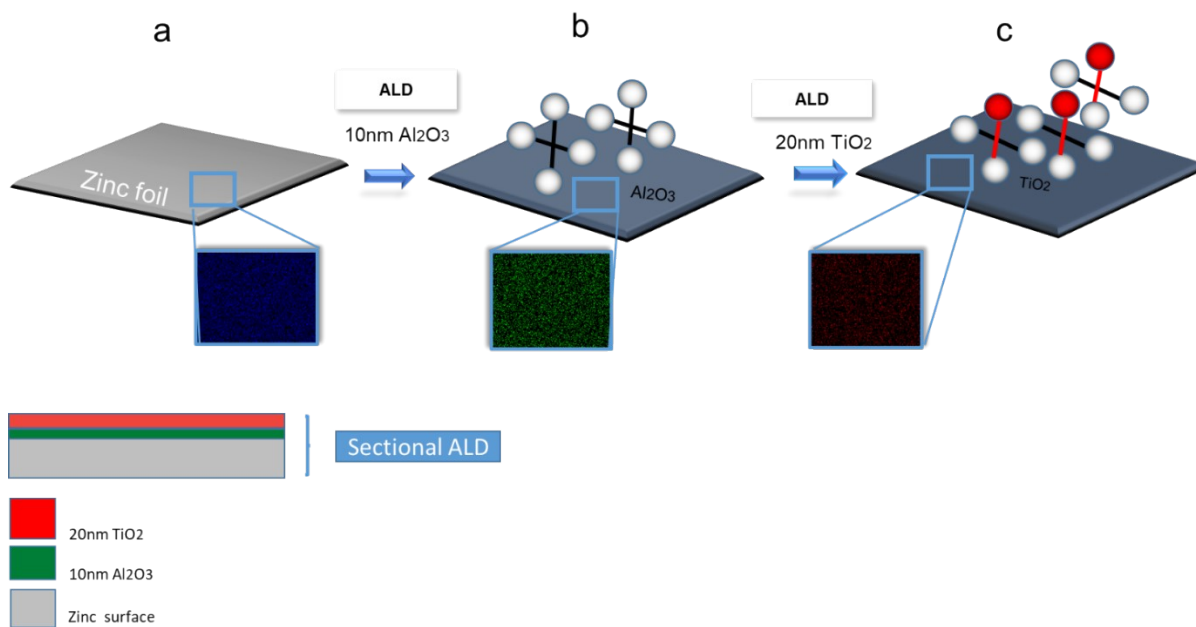

**Figure S12.** Schematic illustration of the fabrication process for 3D Zn@Al<sub>2</sub>O<sub>3</sub>@TiO<sub>2</sub> with different coatings architectures: a) zinc foil, b) coated with 10 nm Al<sub>2</sub>O<sub>3</sub> c) Zn@Al<sub>2</sub>O<sub>3</sub> after additional 20 nm TiO<sub>2</sub> coating.

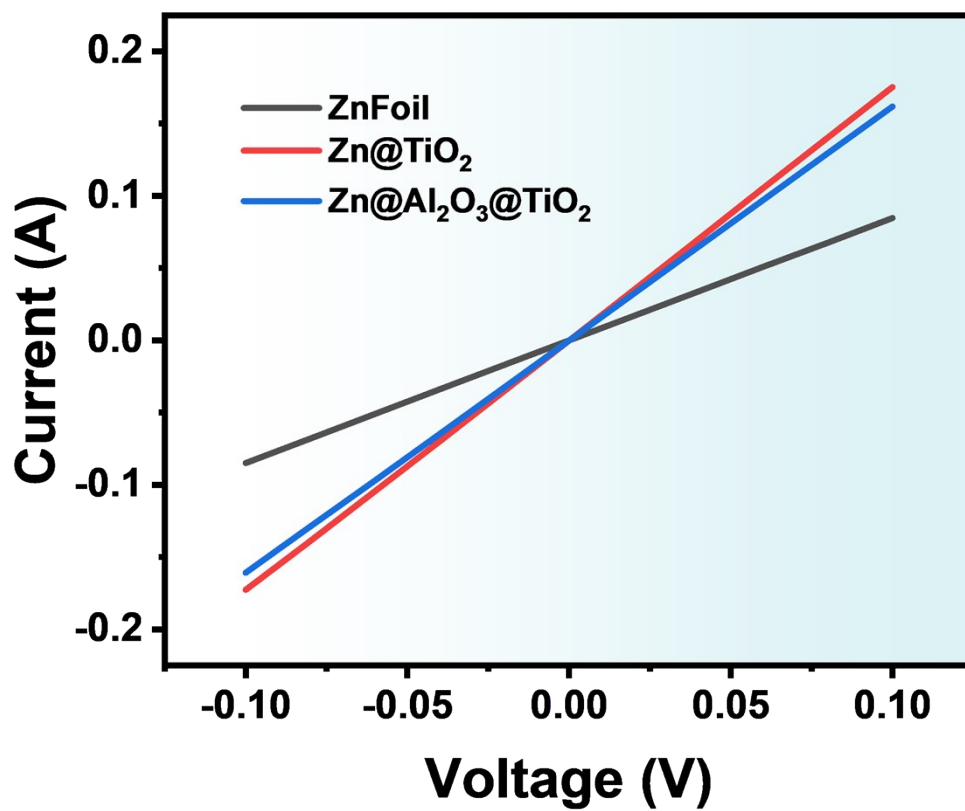

Figure S13. Comparative I-V tests for Zn foil, Zn@ TiO<sub>2</sub> and Zn@Al<sub>2</sub>O<sub>3</sub>@TiO<sub>2</sub>.

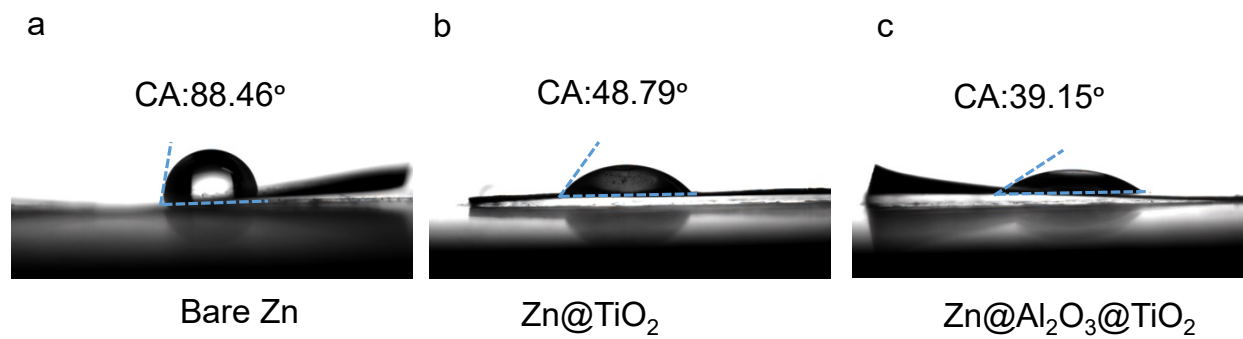

**Figure S14.** Contact angles of a) bare Zn b) Zn@TiO<sub>2</sub> and c) Zn@Al<sub>2</sub>O<sub>3</sub>@TiO<sub>2</sub> with water droplets.

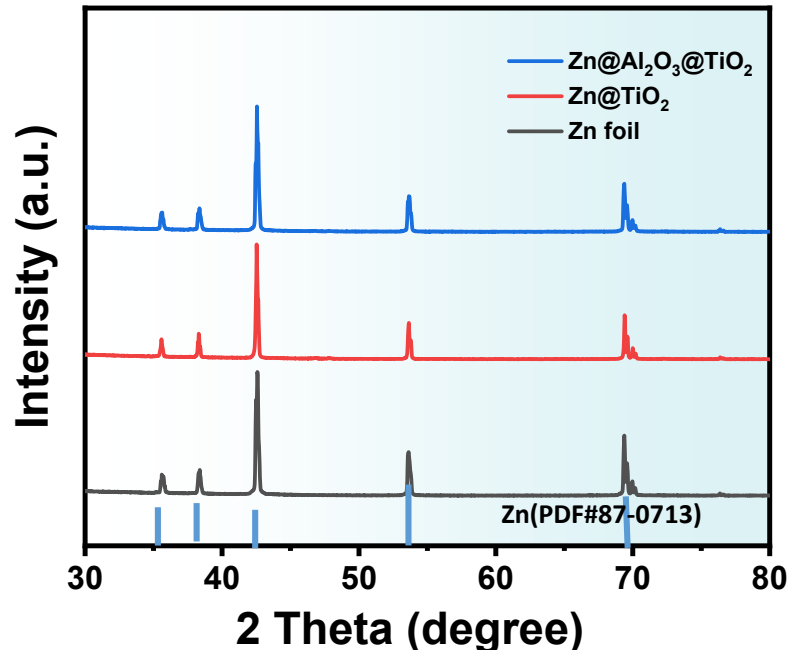

**Figure S15.** Surface XRD patterns of Zn foil, Zn@TiO<sub>2</sub> and Zn@Al<sub>2</sub>O<sub>3</sub>@TiO<sub>2</sub> electrodes.

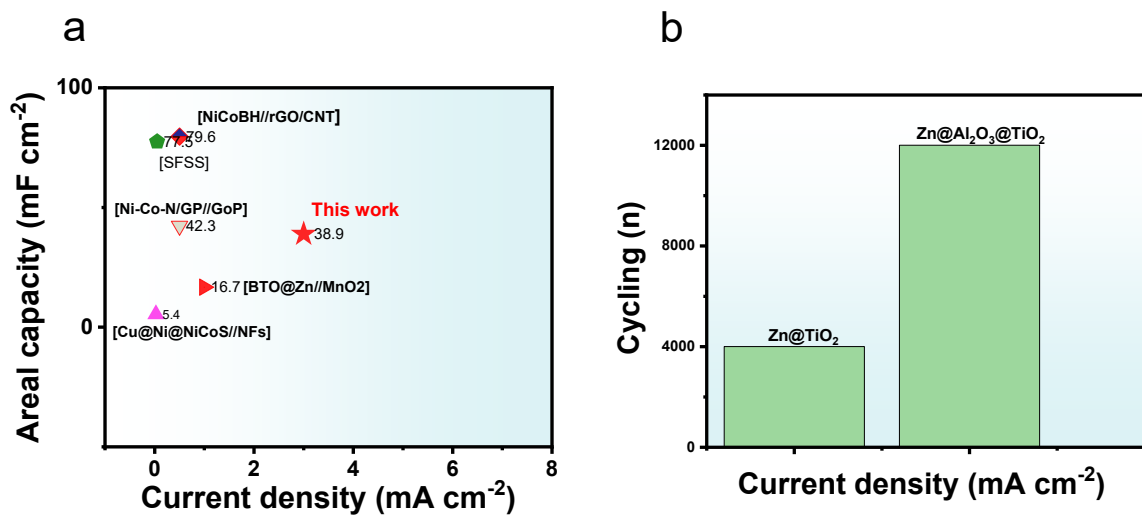

**Figure S16.** a) Comparison of the areal capacity of the Zn@Al<sub>2</sub>O<sub>3</sub>@TiO<sub>2</sub>//3D NM@NiCoP with results from other studies at various current densities, b) comparison of cycling stability between devices with Zn@TiO<sub>2</sub> and Zn@Al<sub>2</sub>O<sub>3</sub>@TiO<sub>2</sub> anodes at same current density of 3 mA cm<sup>-2</sup> in a two-electrode system.

**Table S1** Performance comparison of relevant works in a three-electrode system.

| Electrode Materials                              | Current Density          | Capacitance                | Working Electrode     | Electrolyte                        | Ref.      |
|--------------------------------------------------|--------------------------|----------------------------|-----------------------|------------------------------------|-----------|
| 3D NM@NiCoP                                      | 4 mA cm <sup>-2</sup>    | 26.1 μAh cm <sup>-2</sup>  | 1×1 cm <sup>2</sup>   | 2M KOH                             | This work |
| 3D NM@NiCo BH                                    | 1 mA cm <sup>-2</sup>    | 75.58 μAh cm <sup>-2</sup> | 1×1 cm <sup>2</sup>   | 2M KOH                             | 1         |
| NM@NiCoBH                                        | 1 mA cm <sup>-2</sup>    | 12 μAh cm <sup>-2</sup>    | 1×1cm <sup>2</sup>    | 1M KOH                             | 2         |
| NM@NiCoP                                         | 1 mA cm <sup>-2</sup>    | 11 μAh cm <sup>-2</sup>    | 1×1cm <sup>2</sup>    | 2M KOH                             | 3         |
| 3D CoNiDHs/NiCo <sub>2</sub> O <sub>4</sub> /CFP | 10 mA cm <sup>-2</sup>   | 67 μAh cm <sup>-2</sup>    | 3×4 cm <sup>2</sup>   | 1M KOH                             | 4         |
| Ni-CoN/GP                                        | 0.2 mA cm <sup>-2</sup>  | 6.7 μAh cm <sup>-2</sup>   | 1.5×2 cm <sup>2</sup> | 3M KOH                             | 5         |
| CO <sub>3</sub> O <sub>4</sub> @Au@CuO           | 1 mA cm <sup>-2</sup>    | 33.3 μAh cm <sup>-2</sup>  | /                     | 1M Na <sub>2</sub> SO <sub>4</sub> | 6         |
| NiCo-BOH                                         | 1 mA cm <sup>-2</sup>    | 42.2 μAh cm <sup>-2</sup>  | /                     | 1M KOH                             | 7         |
| L-MCH                                            | 3 mA cm <sup>-2</sup>    | 49 μAh cm <sup>-2</sup>    | 1×2 cm <sup>-2</sup>  | 4M KOH                             | 8         |
| Ni/Co-N-350                                      | 2 mA cm <sup>-2</sup>    | 53 μAh cm <sup>-2</sup>    | /                     | 1M KOH                             | 9         |
| MoS <sub>2</sub> @Ni mesh                        | 1 mA cm <sup>-2</sup>    | 1.62 μAh cm <sup>-2</sup>  | 1×2 cm <sup>-2</sup>  | 1M Na <sub>2</sub> SO <sub>4</sub> | 10        |
| Cu@Ni@Ni:Co-S                                    | 0.066 mAcm <sup>-2</sup> | 6.94 μAh cm <sup>-2</sup>  | 1×2 cm <sup>2</sup>   | PVA-KOH                            | 11        |
| Co <sub>3</sub> O <sub>4</sub> @NiO              | 5 mA cm <sup>-2</sup>    | 2.91 mAh cm <sup>-2</sup>  | 1×1 cm <sup>2</sup>   | 6M KOH                             | 12        |
| CC-CF@NiO                                        | 5 mA cm <sup>-2</sup>    | 0.35 mAh cm <sup>-2</sup>  | 2×2 cm <sup>2</sup>   | 2M KOH                             | 13        |

**Table S2.** Performance comparison of energy storage devices in a 2-electrode system.

| Anode                                               | Cathode                          | Electrolytes                        | Capacity                     | Current Density           | Ref       |
|-----------------------------------------------------|----------------------------------|-------------------------------------|------------------------------|---------------------------|-----------|
| Zn@Al <sub>2</sub> O <sub>3</sub> @TiO <sub>2</sub> | 3D NM@NiCoP                      | 2 M KOH                             | 5.42 $\mu\text{Ah cm}^{-2}$  | 3 mA $\text{cm}^{-2}$     | This work |
| RGO HSC                                             | NiCo-P/Pox                       | 6 M KOH                             | 67.4 $\mu\text{Ah cm}^{-2}$  | 2 mA $\text{cm}^{-2}$     | 14        |
| Zn                                                  | NiCO <sub>2</sub> O <sub>4</sub> | 1 M KOH                             | 57.3 $\mu\text{Ah cm}^{-2}$  | 0.5 mA $\text{cm}^{-2}$   | 15        |
| GOP                                                 | Ni-Co-N/GP                       | PVA-KOH                             | 18.8 $\mu\text{Ah cm}^{-2}$  | 0.5 mA $\text{cm}^{-2}$   | 5         |
| rGO/CNT                                             | NiCoBH                           | PVA-KOH                             | 29.18 $\mu\text{Ah cm}^{-2}$ | 0.5 mA $\text{cm}^{-2}$   | 7         |
| Cu@Ni@Ni:Co-S NFs                                   | Cu@Ni@Ni:Co-S NFs                | PVA-KOH                             | 1.21 $\mu\text{Ah cm}^{-2}$  | 0.025 mA $\text{cm}^{-2}$ | 11        |
| C-pen ink                                           | Ni-pen ink                       | 1 M Na <sub>2</sub> SO <sub>4</sub> | 4.64 $\mu\text{Ah cm}^{-2}$  | 1 mA $\text{cm}^{-2}$     | 16        |
| PEDOT-S:PSS                                         | PEDOT-S:PSS                      | 1 M H <sub>3</sub> PO <sub>4</sub>  | 23.5 $\mu\text{Ah cm}^{-2}$  | 1 mA $\text{cm}^{-2}$     | 17        |
| siloxene nanosheets                                 | Zn                               | WiS                                 | 3.11 $\mu\text{Ah cm}^{-2}$  | 0.05 mA $\text{cm}^{-2}$  | 18        |
| Ag NW/graphene                                      | AgNW@NiCo/NiCo(OH) <sub>2</sub>  | 2 M KOH                             | 3.2 $\mu\text{Ah cm}^{-2}$   | 0.2 mA $\text{cm}^{-2}$   | 19        |
| MnO NP/TC/ITO NP/TC)50                              | MnO NP/TC/ITO NP/TC)50           | PVA/LiCl                            | 2.24 $\mu\text{Ah cm}^{-2}$  | 0.05 mA $\text{cm}^{-2}$  | 20        |



**Table S3.** Comparison of the cycling stability of Zn@Al<sub>2</sub>O<sub>3</sub>@TiO<sub>2</sub>//3D NM@NiCoP from this work with other materials used in electrochemical energy storage devices in units of cm<sup>2</sup>.

| cathode                              | anode                                               | electrolyte                                       | Potential/V | capacitance                                               | cycling                  | Ref          |
|--------------------------------------|-----------------------------------------------------|---------------------------------------------------|-------------|-----------------------------------------------------------|--------------------------|--------------|
| 3D NM@NiCoP                          | Zn@Al <sub>2</sub> O <sub>3</sub> @TiO <sub>2</sub> | KOH                                               | 1.4-1.95    | 5.42 μAh cm <sup>-2</sup><br>(3 mA cm <sup>-2</sup> )     | 91%<br>11000<br>cycles   | This<br>work |
| CNT                                  | Zn                                                  | ZnSO <sub>4</sub>                                 | 0.2-1.8     | 34.67 μAh cm <sup>-2</sup><br>(1 mA cm <sup>-2</sup> )    | 87.4%<br>6000<br>cycles  | 21           |
| poly(4,40-TDP)/AC                    | Zn                                                  | ZnSO <sub>4</sub>                                 | 0.1-1.9     | 1.2 mAh cm <sup>-2</sup><br>(1 mA cm <sup>-2</sup> )      | 71%<br>2000<br>cycles    | 22           |
| Ti <sub>3</sub> C <sub>2</sub> MXene | Zn/CNT                                              | ZnSO <sub>4</sub>                                 | 0.1-1.2     | 81.5 μAh cm <sup>-2</sup><br>(10 mA cm <sup>-2</sup> )    | 86.5%<br>6000<br>cycles  | 23           |
| Ti <sub>3</sub> C <sub>2</sub> Tx    | Zn                                                  | PVA/ZnCl <sub>2</sub>                             | 0-1.4       | 43.6 μAh cm <sup>-2</sup><br>(10 mV s <sup>-1</sup> )     | 54.7%<br>50000<br>cycles | 24           |
| MnO <sub>2</sub>                     | 100Al <sub>2</sub> O <sub>3</sub> @Zn               | Zn(SO <sub>3</sub> CF <sub>3</sub> ) <sub>2</sub> | 0.8-1.8     | 3.96 μAh cm <sup>-2</sup><br>(1 mA cm <sup>-2</sup> )     | 89.4%<br>1000<br>cycles  | 25           |
| MnO NP/TC/ITO NP/TC)50               | MnO NP/TC/ITO NP/TC)50                              | PVA/LiCl                                          | 0-0.8       | 0.76 μAh cm <sup>-2</sup><br>(0.5 mA cm <sup>-2</sup> )   | 76%<br>5000<br>cycles    | 20           |
| Ni-Co-N/GP                           | GOP                                                 | PVA-KOH                                           | 0-1.5       | 12.9 μAh cm <sup>-2</sup><br>(5 mA cm <sup>-2</sup> )     | 89%<br>8000<br>cycles    | 5            |
| Cu@Ni@Ni:Co-S NFs                    | Cu@Ni@Ni:Co-S NFs                                   | PVA-KOH                                           | 0-0.8       | 0.45 μAh cm <sup>-2</sup><br>(0.075 mA cm <sup>-2</sup> ) | 92%<br>10000<br>cycles   | 11           |

## References

1. G. Zhang, J. Hu, Y. Nie, Y. Zhao, L. Wang, Y. Li, H. Liu, L. Tang, X. Zhang, D. Li, L. Sun and H. Duan, *Advanced Functional Materials*, 2021, **31**, 2100290.
2. T. Chen, Z. Shuang, J. Hu, Y. Zhao, D. Wei, J. Ye, G. Zhang and H. Duan, *Small*, 2022, **18**, 2201628.
3. G. Zhang, Y. Zhao, J. Hu, H. Liu, T. Chen, H. Yu and H. Duan, *Journal of Materials Chemistry A*, 2022, **10**, 22182-22193.
4. L. Huang, D. Chen, Y. Ding, S. Feng, Z. L. Wang and M. Liu, *Nano Letters*, 2013, **13**, 3135-3139.
5. F. Liu, L. Zeng, Y. Chen, R. Zhang, R. Yang, J. Pang, L. Ding, H. Liu and W. Zhou, *Nano Energy*, 2019, **61**, 18-26.
6. A. K. Singh and D. Sarkar, *Journal of Materials Chemistry A*, 2017, **5**, 21715-21725.
7. M. Liu, Z. Cong, X. Pu, W. Guo, T. Liu, M. Li, Y. Zhang, W. Hu and Z. L. Wang, *Advanced Functional Materials*, 2019, **29**, 1806298.
8. A. Nanwani, K. A. Deshmukh, P. Sivaraman, D. R. Peshwe, I. Sharma, S. J. Dhoble, H. C. Swart, A. D. Deshmukh and B. K. Gupta, *npj 2D Materials and Applications*, 2019, **3**, 45.
9. X. Liu, W. Zang, C. Guan, L. Zhang, Y. Qian, A. M. Elshahawy, D. Zhao, S. J. Pennycook and J. Wang, *ACS Energy Letters*, 2018, **3**, 2462-2469.
10. B. S. Soram, J. Y. Dai, I. S. Thangjam, N. H. Kim and J. H. Lee, *Journal of Materials Chemistry A*, 2020, **8**, 24040-24052.
11. B. S. Soram, I. S. Thangjam, J. Y. Dai, T. Kshetri, N. H. Kim and J. H. Lee, *Chemical Engineering Journal*, 2020, **395**, 125019.
12. Z. Lu, X. Wu, X. Lei, Y. Li and X. Sun, *Inorganic Chemistry Frontiers*, 2015, **2**, 184-187.
13. J. Liu, C. Guan, C. Zhou, Z. Fan, Q. Ke, G. Zhang, C. Liu and J. Wang, *Advanced Materials*, 2016, **28**, 8732-8739.
14. H. C. Chen, S. Jiang, B. Xu, C. Huang, Y. Hu, Y. Qin, M. He and H. Cao, *Journal of Materials Chemistry A*, 2019, **7**, 6241-6249.
15. H. Zhang, X. Zhang, H. Li, Y. Zhang, Y. Zeng, Y. Tong, P. Zhang and X. Lu, *Green Energy & Environment*, 2018, **3**, 56-62.
16. Y. Fu, X. Cai, H. Wu, Z. Lv, S. Hou, M. Peng, X. Yu and D. Zou, *Advanced Materials*, 2012, **24**, 5713-5718.
17. J. C. Zhuangpei Wang, Qun Guana, Hui Huang, Yinchuan Lia, Jingwen Zhoua, Wei Nia, Bin Wang, Sisi Heb, Huisheng Pengb, *Nano Energy* 2018, **45**.
18. Z. Wang, J. Cheng, Q. Guan, H. Huang, Y. Li, J. Zhou, W. Ni, B. Wang, S. He and H. Peng, *Nano Energy*, 2018, **45**, 210-219.
19. J. Liu, G. Shen, S. Zhao, X. He, C. Zhang, T. Jiang, J. Jiang and B. Chen, *Journal of Materials Chemistry A*, 2019, **7**, 8184-8193.
20. J. Choi, D. Nam, D. Shin, Y. Song, C. H. Kwon, I. Cho, S. W. Lee and J. Cho, *ACS Nano*, 2019, **13**, 12719-12731.
21. G. Sun, H. Yang, G. Zhang, J. Gao, X. Jin, Y. Zhao, L. Jiang and L. Qu, *Energy & Environmental Science*, 2018, **11**, 3367-3374.
22. T. Xin, Y. Wang, N. Wang, Y. Zhao, H. Li, Z. Zhang and J. Liu, *Journal of Materials Chemistry A*, 2019, **7**, 23076-23083.
23. Z. Fan, J. Jin, C. Li, J. Cai, C. Wei, Y. Shao, G. Zou and J. Sun, *ACS Nano*, 2021, **15**, 3098-3107.
24. L. Li, W. Liu, K. Jiang, D. Chen, F. Qu and G. Shen, *Nano-Micro Letters*, 2021, **13**, 100.
25. H. He, H. Tong, X. Song, X. Song and J. Liu, *Journal of Materials Chemistry A*, 2020, **8**, 7836-7846.
